# Supplementary material for: Reference charts for body composition parameters by dual‐energy X‐ray absorptiometry in European children and adolescents aged 6 to 18 years—Results from the Austrian LEAD (Lung, hEart, sociAl, boDy) cohort
Source: PubMed Central journal article supplement — Pediatr Obes. 2020 Jul 2;16(1):e12695. doi: 10.1111/ijpo.12695 (PMC7757249; doi:10.1111/ijpo.12695), 2020-07-02
Supplement: IJPO-16-e12695-s001.pdf [file IJPO-16-e12695-s001.pdf]

Figure S1. Comparison between NHANES and LEAD cohort according to Z-scores distribution

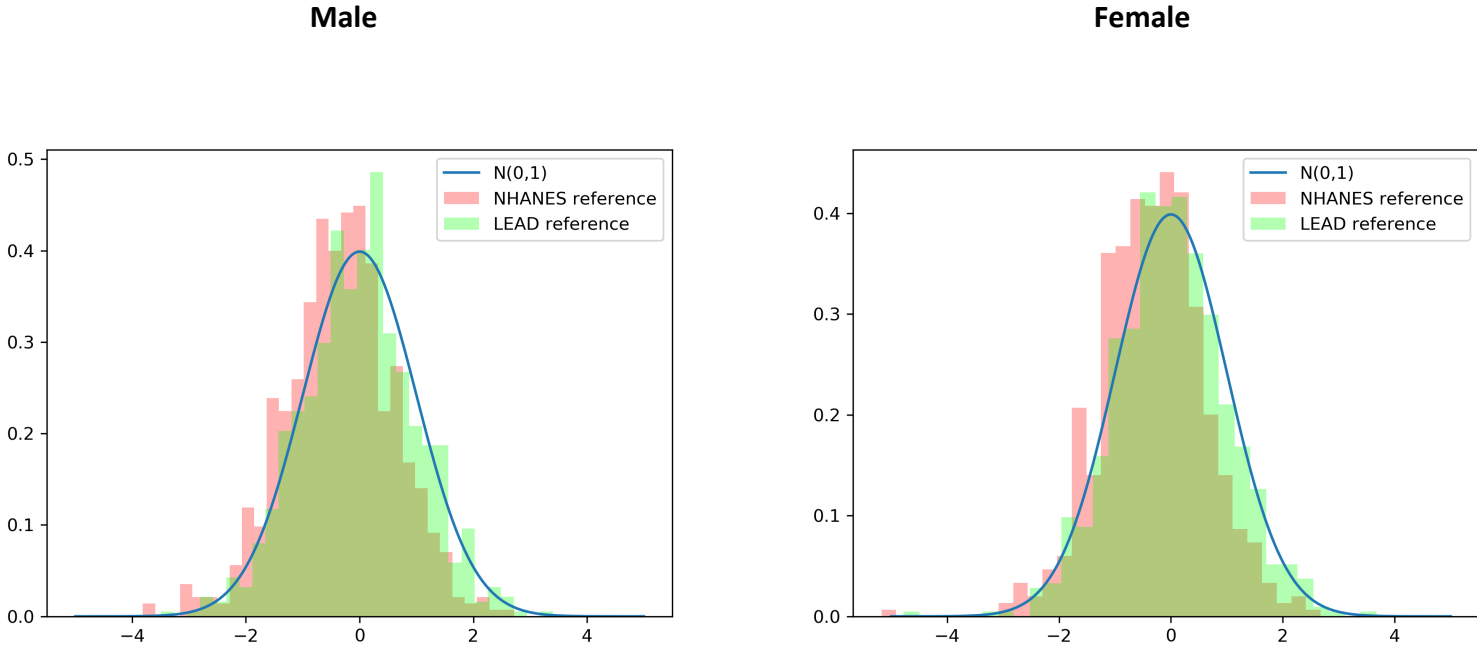

Distribution of LMI Z-scores calculated with the NHANES reference values (pink) and the LEAD reference values (green) for participants of the LEAD cohort.
