# Supplementary material for: Reference charts for body composition parameters by dual‐energy X‐ray absorptiometry in European children and adolescents aged 6 to 18 years—Results from the Austrian LEAD (Lung, hEart, sociAl, boDy) cohort
Source: PubMed Central journal article supplement — Pediatr Obes. 2020 Jul 2;16(1):e12695. doi: 10.1111/ijpo.12695 (PMC7757249; doi:10.1111/ijpo.12695), 2020-07-02
Supplement: IJPO-16-e12695-s002.pdf [file IJPO-16-e12695-s002.pdf]

**Tables S2. Reference values for percentiles of different body composition parameters.**

**BMI, height, weight, FMI, %FM, FM trunk/limbs, LMI, ALMI, fFMI, fLMI, fALMI, fBMI**

**BMI male**

| age (years) | lambda | mu    | sigma | 3%    | 10%   | 25%   | 50%   | 75%   | 90%   | 97%   |
|-------------|--------|-------|-------|-------|-------|-------|-------|-------|-------|-------|
| 6           | -2.45  | 15.39 | 0.10  | 13.14 | 13.73 | 14.44 | 15.39 | 16.61 | 18.04 | 20.00 |
| 7           | -2.31  | 15.76 | 0.11  | 13.30 | 13.95 | 14.72 | 15.76 | 17.11 | 18.72 | 20.93 |
| 8           | -2.17  | 16.18 | 0.12  | 13.42 | 14.13 | 14.99 | 16.18 | 17.73 | 19.62 | 22.31 |
| 9           | -2.04  | 16.70 | 0.14  | 13.57 | 14.37 | 15.34 | 16.70 | 18.51 | 20.77 | 24.09 |
| 10          | -1.90  | 17.30 | 0.15  | 13.82 | 14.70 | 15.78 | 17.30 | 19.34 | 21.93 | 25.81 |
| 11          | -1.76  | 17.93 | 0.16  | 14.13 | 15.09 | 16.27 | 17.93 | 20.17 | 23.01 | 27.25 |
| 12          | -1.62  | 18.59 | 0.16  | 14.52 | 15.55 | 16.81 | 18.59 | 20.95 | 23.92 | 28.24 |
| 13          | -1.48  | 19.25 | 0.17  | 14.90 | 16.01 | 17.36 | 19.25 | 21.75 | 24.84 | 29.23 |
| 14          | -1.35  | 19.91 | 0.17  | 15.19 | 16.39 | 17.86 | 19.91 | 22.61 | 25.93 | 30.59 |
| 15          | -1.21  | 20.55 | 0.17  | 15.60 | 16.87 | 18.41 | 20.55 | 23.31 | 26.63 | 31.13 |
| 16          | -1.07  | 21.17 | 0.15  | 16.48 | 17.72 | 19.20 | 21.17 | 23.61 | 26.37 | 29.84 |
| 17          | -0.93  | 21.79 | 0.13  | 17.58 | 18.74 | 20.07 | 21.79 | 23.81 | 25.97 | 28.51 |

**BMI female**

| age (years) | lambda | mu    | sigma | 3%    | 10%   | 25%   | 50%   | 75%   | 90%   | 97%   |
|-------------|--------|-------|-------|-------|-------|-------|-------|-------|-------|-------|
| 6           | -1.13  | 15.28 | 0.11  | 12.70 | 13.42 | 14.23 | 15.28 | 16.50 | 17.79 | 19.30 |
| 7           | -1.17  | 15.70 | 0.13  | 12.73 | 13.54 | 14.47 | 15.70 | 17.17 | 18.79 | 20.74 |
| 8           | -1.21  | 16.16 | 0.14  | 12.78 | 13.68 | 14.74 | 16.16 | 17.92 | 19.92 | 22.45 |
| 9           | -1.25  | 16.63 | 0.16  | 12.88 | 13.85 | 15.03 | 16.63 | 18.68 | 21.09 | 24.28 |
| 10          | -1.29  | 17.12 | 0.17  | 13.11 | 14.14 | 15.39 | 17.12 | 19.38 | 22.09 | 25.81 |
| 11          | -1.33  | 17.71 | 0.17  | 13.56 | 14.62 | 15.92 | 17.71 | 20.07 | 22.92 | 26.89 |
| 12          | -1.37  | 18.39 | 0.17  | 14.19 | 15.27 | 16.58 | 18.39 | 20.77 | 23.64 | 27.62 |
| 13          | -1.41  | 19.10 | 0.16  | 14.88 | 15.97 | 17.28 | 19.10 | 21.45 | 24.28 | 28.15 |
| 14          | -1.45  | 19.78 | 0.15  | 15.57 | 16.66 | 17.97 | 19.78 | 22.09 | 24.86 | 28.59 |
| 15          | -1.49  | 20.40 | 0.15  | 16.22 | 17.31 | 18.62 | 20.40 | 22.68 | 25.37 | 28.96 |
| 16          | -1.53  | 20.94 | 0.14  | 16.79 | 17.88 | 19.18 | 20.94 | 23.19 | 25.81 | 29.30 |
| 17          | -1.57  | 21.41 | 0.14  | 17.26 | 18.34 | 19.65 | 21.41 | 23.64 | 26.26 | 29.72 |

**height male**

| age (years) | lambda | mu     | sigma | 3%     | 10%    | 25%    | 50%    | 75%    | 90%    | 97%    |
|-------------|--------|--------|-------|--------|--------|--------|--------|--------|--------|--------|
| 6           | 2.66   | 118.17 | 0.05  | 107.29 | 110.95 | 114.47 | 118.17 | 121.69 | 124.73 | 127.60 |
| 7           | 2.27   | 124.18 | 0.05  | 112.84 | 116.61 | 120.27 | 124.18 | 127.94 | 131.21 | 134.33 |
| 8           | 1.89   | 130.03 | 0.05  | 118.18 | 122.07 | 125.89 | 130.03 | 134.05 | 137.58 | 140.99 |
| 9           | 1.50   | 135.78 | 0.05  | 123.36 | 127.38 | 131.39 | 135.78 | 140.09 | 143.92 | 147.65 |
| 10          | 1.12   | 141.63 | 0.05  | 128.65 | 132.80 | 136.99 | 141.63 | 146.24 | 150.38 | 154.46 |
| 11          | 0.74   | 147.56 | 0.05  | 134.00 | 138.28 | 142.66 | 147.56 | 152.50 | 156.99 | 161.45 |
| 12          | 0.35   | 153.80 | 0.05  | 139.78 | 144.15 | 148.67 | 153.80 | 159.04 | 163.86 | 168.70 |
| 13          | -0.03  | 160.12 | 0.05  | 145.90 | 150.28 | 154.86 | 160.12 | 165.56 | 170.62 | 175.77 |
| 14          | -0.41  | 165.96 | 0.05  | 151.96 | 156.23 | 160.73 | 165.96 | 171.42 | 176.56 | 181.85 |
| 15          | -0.80  | 170.96 | 0.04  | 157.64 | 161.68 | 165.96 | 170.96 | 176.23 | 181.24 | 186.43 |
| 16          | -1.18  | 174.82 | 0.04  | 162.38 | 166.13 | 170.13 | 174.82 | 179.81 | 184.57 | 189.54 |

|    |       |        |      |        |        |        |        |        |        |        |
|----|-------|--------|------|--------|--------|--------|--------|--------|--------|--------|
| 17 | -1.56 | 177.53 | 0.04 | 165.91 | 169.39 | 173.12 | 177.53 | 182.23 | 186.74 | 191.49 |
|----|-------|--------|------|--------|--------|--------|--------|--------|--------|--------|

**height female**

| age (years) | lambda | mu     | sigma | 3%     | 10%    | 25%    | 50%    | 75%    | 90%    | 97%    |
|-------------|--------|--------|-------|--------|--------|--------|--------|--------|--------|--------|
| 6           | 1.78   | 117.51 | 0.04  | 108.06 | 111.14 | 114.19 | 117.51 | 120.76 | 123.62 | 126.40 |
| 7           | 1.05   | 123.40 | 0.04  | 113.35 | 116.56 | 119.80 | 123.40 | 126.99 | 130.22 | 133.40 |
| 8           | 0.40   | 129.23 | 0.05  | 118.52 | 121.87 | 125.32 | 129.23 | 133.20 | 136.84 | 140.49 |
| 9           | -0.04  | 135.00 | 0.05  | 123.51 | 127.06 | 130.75 | 135.00 | 139.38 | 143.45 | 147.59 |
| 10          | -0.17  | 140.98 | 0.05  | 128.71 | 132.48 | 136.43 | 140.98 | 145.71 | 150.13 | 154.64 |
| 11          | -0.04  | 147.12 | 0.05  | 134.32 | 138.27 | 142.39 | 147.12 | 152.01 | 156.56 | 161.19 |
| 12          | 0.18   | 153.07 | 0.05  | 140.11 | 144.14 | 148.31 | 153.07 | 157.95 | 162.45 | 167.00 |
| 13          | 0.37   | 158.18 | 0.04  | 145.36 | 149.37 | 153.50 | 158.18 | 162.95 | 167.31 | 171.69 |
| 14          | 0.47   | 161.82 | 0.04  | 149.29 | 153.22 | 157.26 | 161.82 | 166.44 | 170.66 | 174.88 |
| 15          | 0.43   | 163.92 | 0.04  | 151.75 | 155.56 | 159.49 | 163.92 | 168.41 | 172.52 | 176.63 |
| 16          | 0.27   | 165.10 | 0.04  | 153.24 | 156.95 | 160.77 | 165.10 | 169.51 | 173.55 | 177.61 |
| 17          | 0.09   | 165.79 | 0.04  | 154.23 | 157.83 | 161.56 | 165.79 | 170.12 | 174.11 | 178.13 |

**weight male**

| age (years) | lambda | mu    | sigma | 3%    | 10%   | 25%   | 50%   | 75%   | 90%   | 97%   |
|-------------|--------|-------|-------|-------|-------|-------|-------|-------|-------|-------|
| 6           | -1.04  | 21.11 | 0.17  | 16.09 | 17.40 | 18.98 | 21.11 | 23.79 | 26.87 | 30.85 |
| 7           | -0.74  | 24.22 | 0.17  | 18.05 | 19.69 | 21.63 | 24.22 | 27.39 | 30.93 | 35.28 |
| 8           | -0.67  | 27.42 | 0.18  | 20.07 | 22.02 | 24.33 | 27.42 | 31.23 | 35.48 | 40.73 |
| 9           | -0.83  | 30.98 | 0.20  | 22.46 | 24.66 | 27.33 | 30.98 | 35.64 | 41.07 | 48.12 |
| 10          | -0.97  | 35.05 | 0.21  | 25.24 | 27.72 | 30.77 | 35.05 | 40.69 | 47.54 | 56.97 |
| 11          | -0.68  | 39.53 | 0.21  | 27.73 | 30.77 | 34.46 | 39.53 | 45.99 | 53.48 | 63.13 |
| 12          | -0.48  | 44.41 | 0.22  | 30.57 | 34.19 | 38.54 | 44.41 | 51.69 | 59.85 | 69.93 |
| 13          | -0.47  | 49.52 | 0.22  | 34.11 | 38.15 | 43.00 | 49.52 | 57.59 | 66.63 | 77.74 |
| 14          | -0.61  | 54.66 | 0.21  | 38.41 | 42.64 | 47.74 | 54.66 | 63.35 | 73.25 | 85.70 |
| 15          | -0.88  | 59.69 | 0.19  | 43.51 | 47.68 | 52.74 | 59.69 | 68.58 | 79.00 | 92.64 |
| 16          | -0.73  | 64.52 | 0.17  | 48.28 | 52.62 | 57.74 | 64.52 | 72.81 | 81.99 | 93.21 |
| 17          | 0.04   | 69.18 | 0.15  | 52.29 | 57.19 | 62.59 | 69.18 | 76.42 | 83.56 | 91.24 |

**weight female**

| age (years) | lambda | mu    | sigma | 3%    | 10%   | 25%   | 50%   | 75%   | 90%   | 97%   |
|-------------|--------|-------|-------|-------|-------|-------|-------|-------|-------|-------|
| 6           | -1.07  | 20.91 | 0.15  | 16.28 | 17.51 | 18.97 | 20.91 | 23.32 | 26.03 | 29.45 |
| 7           | -1.07  | 23.70 | 0.17  | 17.97 | 19.46 | 21.26 | 23.70 | 26.80 | 30.42 | 35.14 |
| 8           | -1.07  | 26.84 | 0.19  | 19.85 | 21.63 | 23.81 | 26.84 | 30.79 | 35.54 | 42.01 |
| 9           | -1.07  | 30.14 | 0.20  | 21.83 | 23.92 | 26.50 | 30.14 | 35.00 | 41.02 | 49.52 |
| 10          | -1.07  | 33.68 | 0.21  | 24.13 | 26.50 | 29.46 | 33.68 | 39.37 | 46.53 | 56.88 |
| 11          | -1.07  | 37.97 | 0.21  | 27.27 | 29.93 | 33.25 | 37.97 | 44.32 | 52.29 | 63.75 |
| 12          | -1.07  | 42.88 | 0.20  | 31.24 | 34.18 | 37.79 | 42.88 | 49.62 | 57.92 | 69.53 |
| 13          | -1.08  | 47.69 | 0.19  | 35.42 | 38.56 | 42.39 | 47.69 | 54.58 | 62.84 | 74.03 |
| 14          | -1.08  | 51.79 | 0.17  | 39.18 | 42.45 | 46.39 | 51.79 | 58.67 | 66.72 | 77.31 |
| 15          | -1.08  | 54.96 | 0.16  | 42.22 | 45.56 | 49.56 | 54.96 | 61.75 | 69.55 | 79.58 |
| 16          | -1.08  | 57.31 | 0.16  | 44.47 | 47.86 | 51.90 | 57.31 | 64.03 | 71.67 | 81.34 |
| 17          | -1.08  | 58.99 | 0.15  | 45.98 | 49.43 | 53.52 | 58.99 | 65.77 | 73.43 | 83.07 |

**FMI male**

| age (years) | lambda | mu   | sigma | 3%   | 10%  | 25%  | 50%  | 75%  | 90%  | 97%   |
|-------------|--------|------|-------|------|------|------|------|------|------|-------|
| 6           | -0.71  | 4.02 | 0.26  | 2.64 | 2.98 | 3.41 | 4.02 | 4.85 | 5.89 | 7.35  |
| 7           | -0.71  | 4.05 | 0.29  | 2.57 | 2.92 | 3.38 | 4.05 | 4.99 | 6.21 | 8.01  |
| 8           | -0.71  | 4.18 | 0.32  | 2.55 | 2.93 | 3.43 | 4.18 | 5.27 | 6.74 | 9.05  |
| 9           | -0.71  | 4.42 | 0.35  | 2.59 | 3.01 | 3.56 | 4.42 | 5.71 | 7.54 | 10.59 |
| 10          | -0.71  | 4.70 | 0.37  | 2.66 | 3.11 | 3.73 | 4.70 | 6.19 | 8.41 | 12.36 |
| 11          | -0.71  | 4.88 | 0.39  | 2.70 | 3.18 | 3.83 | 4.88 | 6.55 | 9.09 | 13.85 |
| 12          | -0.71  | 4.93 | 0.41  | 2.67 | 3.16 | 3.83 | 4.93 | 6.69 | 9.46 | 14.88 |
| 13          | -0.71  | 4.83 | 0.42  | 2.58 | 3.07 | 3.74 | 4.83 | 6.62 | 9.49 | 15.26 |
| 14          | -0.71  | 4.68 | 0.42  | 2.50 | 2.96 | 3.61 | 4.68 | 6.41 | 9.20 | 14.84 |
| 15          | -0.71  | 4.49 | 0.41  | 2.44 | 2.88 | 3.50 | 4.49 | 6.10 | 8.62 | 13.55 |
| 16          | -0.71  | 4.32 | 0.38  | 2.42 | 2.84 | 3.41 | 4.32 | 5.75 | 7.88 | 11.78 |
| 17          | -0.71  | 4.22 | 0.35  | 2.45 | 2.85 | 3.39 | 4.22 | 5.47 | 7.25 | 10.27 |

**FMI female**

| age (years) | lambda | mu   | sigma | 3%   | 10%  | 25%  | 50%  | 75%  | 90%   | 97%   |
|-------------|--------|------|-------|------|------|------|------|------|-------|-------|
| 6           | -0.47  | 4.63 | 0.25  | 3.03 | 3.44 | 3.94 | 4.63 | 5.51 | 6.54  | 7.85  |
| 7           | -0.45  | 4.81 | 0.29  | 2.97 | 3.42 | 4.00 | 4.81 | 5.88 | 7.18  | 8.91  |
| 8           | -0.44  | 5.00 | 0.32  | 2.91 | 3.42 | 4.06 | 5.00 | 6.30 | 7.92  | 10.18 |
| 9           | -0.42  | 5.19 | 0.36  | 2.87 | 3.41 | 4.12 | 5.19 | 6.69 | 8.64  | 11.45 |
| 10          | -0.41  | 5.34 | 0.38  | 2.86 | 3.43 | 4.19 | 5.34 | 6.98 | 9.14  | 12.33 |
| 11          | -0.40  | 5.50 | 0.38  | 2.93 | 3.52 | 4.30 | 5.50 | 7.21 | 9.47  | 12.79 |
| 12          | -0.38  | 5.71 | 0.37  | 3.06 | 3.67 | 4.48 | 5.71 | 7.44 | 9.68  | 12.93 |
| 13          | -0.37  | 5.95 | 0.36  | 3.26 | 3.89 | 4.72 | 5.95 | 7.66 | 9.82  | 12.88 |
| 14          | -0.35  | 6.22 | 0.34  | 3.51 | 4.16 | 5.00 | 6.22 | 7.88 | 9.94  | 12.74 |
| 15          | -0.34  | 6.50 | 0.32  | 3.78 | 4.45 | 5.29 | 6.50 | 8.11 | 10.06 | 12.64 |
| 16          | -0.32  | 6.74 | 0.30  | 4.00 | 4.68 | 5.53 | 6.74 | 8.32 | 10.19 | 12.62 |
| 17          | -0.31  | 6.93 | 0.30  | 4.15 | 4.84 | 5.71 | 6.93 | 8.51 | 10.35 | 12.73 |

**%FM male**

| age (years) | lambda | mu    | sigma | 3%    | 10%   | 25%   | 50%   | 75%   | 90%   | 97%   |
|-------------|--------|-------|-------|-------|-------|-------|-------|-------|-------|-------|
| 6           | -0.28  | 26.65 | 0.18  | 19.18 | 21.23 | 23.60 | 26.65 | 30.23 | 33.98 | 38.30 |
| 7           | -0.31  | 26.63 | 0.20  | 18.68 | 20.82 | 23.34 | 26.63 | 30.55 | 34.76 | 39.70 |
| 8           | -0.35  | 27.01 | 0.22  | 18.42 | 20.70 | 23.41 | 27.01 | 31.39 | 36.20 | 41.97 |
| 9           | -0.38  | 27.78 | 0.24  | 18.42 | 20.86 | 23.80 | 27.78 | 32.73 | 38.30 | 45.16 |
| 10          | -0.41  | 28.50 | 0.25  | 18.47 | 21.03 | 24.18 | 28.50 | 34.01 | 40.33 | 48.33 |
| 11          | -0.44  | 28.67 | 0.27  | 18.25 | 20.88 | 24.13 | 28.67 | 34.55 | 41.46 | 50.41 |
| 12          | -0.47  | 28.00 | 0.28  | 17.51 | 20.11 | 23.38 | 28.00 | 34.11 | 41.45 | 51.22 |
| 13          | -0.50  | 26.62 | 0.29  | 16.38 | 18.88 | 22.06 | 26.62 | 32.77 | 40.33 | 50.69 |
| 14          | -0.53  | 25.00 | 0.30  | 15.27 | 17.63 | 20.63 | 25.00 | 30.96 | 38.41 | 48.87 |
| 15          | -0.56  | 23.32 | 0.30  | 14.36 | 16.53 | 19.30 | 23.32 | 28.84 | 35.77 | 45.56 |
| 16          | -0.60  | 21.71 | 0.28  | 13.64 | 15.61 | 18.10 | 21.71 | 26.62 | 32.76 | 41.37 |
| 17          | -0.63  | 20.45 | 0.27  | 13.17 | 14.96 | 17.22 | 20.45 | 24.81 | 30.19 | 37.65 |

**%FM female**

| age (years) | lambda | mu    | sigma | 3%    | 10%   | 25%   | 50%   | 75%   | 90%   | 97%   |
|-------------|--------|-------|-------|-------|-------|-------|-------|-------|-------|-------|
| 6           | -0.25  | 30.92 | 0.17  | 22.90 | 25.14 | 27.69 | 30.92 | 34.64 | 38.47 | 42.80 |
| 7           | -0.18  | 31.47 | 0.18  | 22.56 | 25.03 | 27.86 | 31.47 | 35.63 | 39.94 | 44.82 |

|    |       |       |      |       |       |       |       |       |       |       |
|----|-------|-------|------|-------|-------|-------|-------|-------|-------|-------|
| 8  | -0.10 | 32.12 | 0.20 | 22.25 | 24.98 | 28.11 | 32.12 | 36.76 | 41.57 | 47.01 |
| 9  | -0.02 | 32.58 | 0.21 | 21.89 | 24.84 | 28.24 | 32.58 | 37.60 | 42.80 | 48.66 |
| 10 | 0.05  | 32.44 | 0.22 | 21.33 | 24.41 | 27.94 | 32.44 | 37.61 | 42.93 | 48.87 |
| 11 | 0.13  | 32.21 | 0.22 | 20.94 | 24.08 | 27.68 | 32.21 | 37.38 | 42.63 | 48.43 |
| 12 | 0.21  | 32.10 | 0.22 | 20.87 | 24.04 | 27.63 | 32.10 | 37.13 | 42.18 | 47.68 |
| 13 | 0.28  | 32.19 | 0.21 | 21.19 | 24.34 | 27.86 | 32.19 | 36.98 | 41.71 | 46.79 |
| 14 | 0.36  | 32.64 | 0.20 | 21.97 | 25.08 | 28.50 | 32.64 | 37.15 | 41.53 | 46.17 |
| 15 | 0.43  | 33.27 | 0.18 | 22.94 | 25.99 | 29.31 | 33.27 | 37.51 | 41.57 | 45.81 |
| 16 | 0.51  | 33.65 | 0.17 | 23.64 | 26.64 | 29.86 | 33.65 | 37.66 | 41.46 | 45.38 |
| 17 | 0.59  | 33.67 | 0.17 | 23.87 | 26.84 | 29.99 | 33.67 | 37.51 | 41.12 | 44.81 |

**FM trunk/limbs male**

| age (years) | lambda | mu   | sigma | 3%   | 10%  | 25%  | 50%  | 75%  | 90%  | 97%  |
|-------------|--------|------|-------|------|------|------|------|------|------|------|
| 6           | -0.05  | 0.53 | 0.26  | 0.33 | 0.38 | 0.45 | 0.53 | 0.64 | 0.75 | 0.87 |
| 7           | -0.07  | 0.55 | 0.26  | 0.34 | 0.40 | 0.47 | 0.55 | 0.66 | 0.78 | 0.91 |
| 8           | -0.10  | 0.58 | 0.26  | 0.36 | 0.42 | 0.49 | 0.58 | 0.69 | 0.81 | 0.95 |
| 9           | -0.13  | 0.60 | 0.26  | 0.38 | 0.44 | 0.51 | 0.60 | 0.72 | 0.85 | 1.00 |
| 10          | -0.16  | 0.63 | 0.26  | 0.39 | 0.46 | 0.53 | 0.63 | 0.75 | 0.88 | 1.04 |
| 11          | -0.18  | 0.65 | 0.26  | 0.41 | 0.47 | 0.55 | 0.65 | 0.77 | 0.91 | 1.07 |
| 12          | -0.21  | 0.67 | 0.25  | 0.42 | 0.49 | 0.56 | 0.67 | 0.79 | 0.93 | 1.10 |
| 13          | -0.24  | 0.68 | 0.25  | 0.43 | 0.50 | 0.58 | 0.68 | 0.81 | 0.96 | 1.13 |
| 14          | -0.27  | 0.69 | 0.25  | 0.44 | 0.51 | 0.59 | 0.69 | 0.83 | 0.97 | 1.15 |
| 15          | -0.29  | 0.70 | 0.25  | 0.45 | 0.52 | 0.60 | 0.70 | 0.84 | 0.99 | 1.17 |
| 16          | -0.32  | 0.71 | 0.25  | 0.46 | 0.52 | 0.60 | 0.71 | 0.84 | 1.00 | 1.18 |
| 17          | -0.35  | 0.72 | 0.25  | 0.46 | 0.53 | 0.61 | 0.72 | 0.85 | 1.00 | 1.19 |

**FM trunk/limbs female**

| age (years) | lambda | mu   | sigma | 3%   | 10%  | 25%  | 50%  | 75%  | 90%  | 97%  |
|-------------|--------|------|-------|------|------|------|------|------|------|------|
| 6           | -0.06  | 0.62 | 0.22  | 0.41 | 0.46 | 0.53 | 0.62 | 0.72 | 0.82 | 0.94 |
| 7           | 0.00   | 0.63 | 0.23  | 0.41 | 0.47 | 0.54 | 0.63 | 0.74 | 0.86 | 0.99 |
| 8           | 0.05   | 0.65 | 0.25  | 0.41 | 0.47 | 0.55 | 0.65 | 0.77 | 0.89 | 1.03 |
| 9           | 0.11   | 0.67 | 0.26  | 0.40 | 0.47 | 0.56 | 0.67 | 0.80 | 0.93 | 1.08 |
| 10          | 0.16   | 0.68 | 0.27  | 0.40 | 0.48 | 0.57 | 0.68 | 0.81 | 0.95 | 1.10 |
| 11          | 0.22   | 0.69 | 0.26  | 0.41 | 0.49 | 0.58 | 0.69 | 0.82 | 0.96 | 1.10 |
| 12          | 0.28   | 0.71 | 0.25  | 0.43 | 0.51 | 0.60 | 0.71 | 0.83 | 0.96 | 1.09 |
| 13          | 0.33   | 0.73 | 0.24  | 0.45 | 0.53 | 0.62 | 0.73 | 0.85 | 0.97 | 1.10 |
| 14          | 0.39   | 0.74 | 0.24  | 0.45 | 0.53 | 0.63 | 0.74 | 0.86 | 0.99 | 1.12 |
| 15          | 0.44   | 0.75 | 0.23  | 0.46 | 0.55 | 0.64 | 0.75 | 0.87 | 0.99 | 1.12 |
| 16          | 0.50   | 0.76 | 0.23  | 0.47 | 0.55 | 0.65 | 0.76 | 0.88 | 0.99 | 1.11 |
| 17          | 0.56   | 0.76 | 0.24  | 0.45 | 0.54 | 0.64 | 0.76 | 0.89 | 1.01 | 1.13 |

**LMI male**

| age (years) | lambda | mu    | sigma | 3%    | 10%   | 25%   | 50%   | 75%   | 90%   | 97%   |
|-------------|--------|-------|-------|-------|-------|-------|-------|-------|-------|-------|
| 6           | -0.66  | 11.08 | 0.07  | 9.73  | 10.13 | 10.56 | 11.08 | 11.64 | 12.19 | 12.77 |
| 7           | -0.57  | 11.25 | 0.08  | 9.78  | 10.21 | 10.69 | 11.25 | 11.87 | 12.47 | 13.11 |
| 8           | -0.49  | 11.44 | 0.08  | 9.81  | 10.29 | 10.81 | 11.44 | 12.12 | 12.78 | 13.50 |
| 9           | -0.40  | 11.67 | 0.09  | 9.90  | 10.42 | 10.99 | 11.67 | 12.42 | 13.14 | 13.92 |
| 10          | -0.31  | 11.99 | 0.09  | 10.09 | 10.65 | 11.25 | 11.99 | 12.78 | 13.56 | 14.38 |

|    |       |       |      |       |       |       |       |       |       |       |
|----|-------|-------|------|-------|-------|-------|-------|-------|-------|-------|
| 11 | -0.23 | 12.39 | 0.10 | 10.33 | 10.94 | 11.60 | 12.39 | 13.25 | 14.08 | 14.97 |
| 12 | -0.14 | 12.91 | 0.10 | 10.63 | 11.30 | 12.03 | 12.91 | 13.86 | 14.79 | 15.77 |
| 13 | -0.05 | 13.54 | 0.11 | 10.95 | 11.71 | 12.54 | 13.54 | 14.61 | 15.66 | 16.77 |
| 14 | 0.04  | 14.23 | 0.12 | 11.28 | 12.15 | 13.10 | 14.23 | 15.46 | 16.65 | 17.92 |
| 15 | 0.12  | 14.96 | 0.12 | 11.79 | 12.73 | 13.75 | 14.96 | 16.26 | 17.52 | 18.84 |
| 16 | 0.21  | 15.68 | 0.12 | 12.57 | 13.50 | 14.50 | 15.68 | 16.94 | 18.14 | 19.38 |
| 17 | 0.30  | 16.40 | 0.10 | 13.48 | 14.37 | 15.31 | 16.40 | 17.55 | 18.63 | 19.74 |

**LMI female**

| age (years) | lambda | mu    | sigma | 3%    | 10%   | 25%   | 50%   | 75%   | 90%   | 97%   |
|-------------|--------|-------|-------|-------|-------|-------|-------|-------|-------|-------|
| 6           | -0.01  | 10.27 | 0.08  | 8.79  | 9.24  | 9.72  | 10.27 | 10.86 | 11.42 | 12.01 |
| 7           | -0.18  | 10.47 | 0.09  | 8.90  | 9.37  | 9.87  | 10.47 | 11.11 | 11.72 | 12.37 |
| 8           | -0.35  | 10.68 | 0.09  | 9.02  | 9.51  | 10.04 | 10.68 | 11.38 | 12.06 | 12.79 |
| 9           | -0.52  | 10.91 | 0.10  | 9.16  | 9.67  | 10.23 | 10.91 | 11.67 | 12.42 | 13.23 |
| 10          | -0.69  | 11.20 | 0.10  | 9.36  | 9.89  | 10.48 | 11.20 | 12.01 | 12.83 | 13.74 |
| 11          | -0.86  | 11.60 | 0.10  | 9.68  | 10.22 | 10.83 | 11.60 | 12.47 | 13.36 | 14.36 |
| 12          | -1.03  | 12.08 | 0.10  | 10.10 | 10.65 | 11.29 | 12.08 | 13.00 | 13.96 | 15.06 |
| 13          | -1.20  | 12.56 | 0.10  | 10.53 | 11.09 | 11.74 | 12.56 | 13.52 | 14.53 | 15.71 |
| 14          | -1.37  | 12.94 | 0.10  | 10.89 | 11.46 | 12.11 | 12.94 | 13.92 | 14.97 | 16.22 |
| 15          | -1.54  | 13.24 | 0.10  | 11.20 | 11.76 | 12.40 | 13.24 | 14.23 | 15.31 | 16.60 |
| 16          | -1.71  | 13.50 | 0.10  | 11.48 | 12.03 | 12.67 | 13.50 | 14.49 | 15.58 | 16.90 |
| 17          | -1.88  | 13.72 | 0.10  | 11.73 | 12.27 | 12.90 | 13.72 | 14.71 | 15.81 | 17.16 |

**ALMI male**

| age (years) | lambda | mu   | sigma | 3%   | 10%  | 25%  | 50%  | 75%  | 90%  | 97%   |
|-------------|--------|------|-------|------|------|------|------|------|------|-------|
| 6           | -0.07  | 4.25 | 0.13  | 3.33 | 3.60 | 3.89 | 4.25 | 4.64 | 5.02 | 5.43  |
| 7           | -0.05  | 4.47 | 0.13  | 3.50 | 3.79 | 4.09 | 4.47 | 4.88 | 5.28 | 5.71  |
| 8           | -0.03  | 4.69 | 0.13  | 3.66 | 3.96 | 4.29 | 4.69 | 5.13 | 5.56 | 6.02  |
| 9           | -0.01  | 4.94 | 0.14  | 3.83 | 4.16 | 4.51 | 4.94 | 5.41 | 5.88 | 6.37  |
| 10          | 0.01   | 5.22 | 0.13  | 4.06 | 4.40 | 4.77 | 5.22 | 5.72 | 6.20 | 6.72  |
| 11          | 0.02   | 5.53 | 0.13  | 4.31 | 4.67 | 5.06 | 5.53 | 6.05 | 6.55 | 7.09  |
| 12          | 0.04   | 5.88 | 0.13  | 4.57 | 4.95 | 5.37 | 5.88 | 6.44 | 6.98 | 7.56  |
| 13          | 0.06   | 6.27 | 0.14  | 4.81 | 5.24 | 5.71 | 6.27 | 6.89 | 7.50 | 8.15  |
| 14          | 0.08   | 6.69 | 0.15  | 5.05 | 5.52 | 6.05 | 6.69 | 7.38 | 8.07 | 8.80  |
| 15          | 0.10   | 7.11 | 0.15  | 5.36 | 5.87 | 6.43 | 7.11 | 7.85 | 8.57 | 9.35  |
| 16          | 0.12   | 7.53 | 0.14  | 5.77 | 6.29 | 6.85 | 7.53 | 8.26 | 8.98 | 9.74  |
| 17          | 0.14   | 7.94 | 0.13  | 6.22 | 6.73 | 7.28 | 7.94 | 8.65 | 9.34 | 10.06 |

**ALMI female**

| age (years) | lambda | mu   | sigma | 3%   | 10%  | 25%  | 50%  | 75%  | 90%  | 97%  |
|-------------|--------|------|-------|------|------|------|------|------|------|------|
| 6           | 0.38   | 3.93 | 0.15  | 2.93 | 3.23 | 3.55 | 3.93 | 4.32 | 4.71 | 5.10 |
| 7           | 0.23   | 4.16 | 0.14  | 3.14 | 3.44 | 3.76 | 4.16 | 4.58 | 4.98 | 5.41 |
| 8           | 0.08   | 4.39 | 0.14  | 3.34 | 3.65 | 3.98 | 4.39 | 4.83 | 5.26 | 5.73 |
| 9           | -0.07  | 4.62 | 0.14  | 3.55 | 3.86 | 4.20 | 4.62 | 5.09 | 5.55 | 6.05 |
| 10          | -0.22  | 4.87 | 0.14  | 3.77 | 4.09 | 4.44 | 4.87 | 5.36 | 5.85 | 6.39 |
| 11          | -0.37  | 5.13 | 0.14  | 4.00 | 4.32 | 4.68 | 5.13 | 5.64 | 6.17 | 6.75 |
| 12          | -0.52  | 5.39 | 0.14  | 4.24 | 4.56 | 4.93 | 5.39 | 5.93 | 6.48 | 7.11 |
| 13          | -0.67  | 5.63 | 0.14  | 4.45 | 4.78 | 5.15 | 5.63 | 6.18 | 6.77 | 7.44 |

|    |       |      |      |      |      |      |      |      |      |      |
|----|-------|------|------|------|------|------|------|------|------|------|
| 14 | -0.82 | 5.82 | 0.13 | 4.63 | 4.95 | 5.33 | 5.82 | 6.39 | 7.00 | 7.71 |
| 15 | -0.97 | 5.96 | 0.13 | 4.77 | 5.10 | 5.47 | 5.96 | 6.54 | 7.17 | 7.92 |
| 16 | -1.12 | 6.08 | 0.13 | 4.90 | 5.22 | 5.59 | 6.08 | 6.68 | 7.32 | 8.11 |
| 17 | -1.27 | 6.20 | 0.13 | 5.02 | 5.34 | 5.71 | 6.20 | 6.80 | 7.47 | 8.29 |

**fFMI male**

| age (years) | lambda | mu   | sigma | 3%   | 10%  | 25%  | 50%  | 75%  | 90%  | 97%   |
|-------------|--------|------|-------|------|------|------|------|------|------|-------|
| 6           | -0.69  | 3.69 | 0.26  | 2.42 | 2.73 | 3.13 | 3.69 | 4.45 | 5.38 | 6.69  |
| 7           | -0.69  | 3.65 | 0.29  | 2.31 | 2.63 | 3.04 | 3.65 | 4.48 | 5.56 | 7.12  |
| 8           | -0.69  | 3.68 | 0.31  | 2.25 | 2.59 | 3.03 | 3.68 | 4.63 | 5.89 | 7.84  |
| 9           | -0.70  | 3.81 | 0.34  | 2.24 | 2.60 | 3.08 | 3.81 | 4.90 | 6.42 | 8.93  |
| 10          | -0.70  | 3.95 | 0.37  | 2.25 | 2.63 | 3.15 | 3.95 | 5.19 | 7.01 | 10.19 |
| 11          | -0.71  | 4.03 | 0.39  | 2.24 | 2.63 | 3.17 | 4.03 | 5.38 | 7.43 | 11.22 |
| 12          | -0.71  | 3.98 | 0.40  | 2.17 | 2.56 | 3.10 | 3.98 | 5.39 | 7.60 | 11.89 |
| 13          | -0.71  | 3.82 | 0.42  | 2.05 | 2.43 | 2.96 | 3.82 | 5.23 | 7.49 | 12.05 |
| 14          | -0.72  | 3.63 | 0.42  | 1.94 | 2.30 | 2.80 | 3.63 | 4.97 | 7.14 | 11.59 |
| 15          | -0.72  | 3.43 | 0.41  | 1.86 | 2.20 | 2.67 | 3.43 | 4.65 | 6.59 | 10.44 |
| 16          | -0.73  | 3.26 | 0.38  | 1.83 | 2.15 | 2.57 | 3.26 | 4.33 | 5.95 | 8.96  |
| 17          | -0.73  | 3.16 | 0.35  | 1.85 | 2.14 | 2.54 | 3.16 | 4.09 | 5.44 | 7.74  |

**fFMI female**

| age (years) | lambda | mu   | sigma | 3%   | 10%  | 25%  | 50%  | 75%  | 90%  | 97%   |
|-------------|--------|------|-------|------|------|------|------|------|------|-------|
| 6           | -0.38  | 4.28 | 0.25  | 2.79 | 3.17 | 3.64 | 4.28 | 5.08 | 5.99 | 7.13  |
| 7           | -0.38  | 4.33 | 0.28  | 2.67 | 3.08 | 3.60 | 4.33 | 5.28 | 6.40 | 7.85  |
| 8           | -0.37  | 4.44 | 0.32  | 2.57 | 3.03 | 3.60 | 4.44 | 5.56 | 6.93 | 8.78  |
| 9           | -0.36  | 4.52 | 0.35  | 2.49 | 2.97 | 3.59 | 4.52 | 5.80 | 7.42 | 9.68  |
| 10          | -0.36  | 4.50 | 0.37  | 2.41 | 2.89 | 3.54 | 4.50 | 5.86 | 7.61 | 10.11 |
| 11          | -0.35  | 4.51 | 0.38  | 2.39 | 2.88 | 3.53 | 4.51 | 5.89 | 7.68 | 10.25 |
| 12          | -0.35  | 4.57 | 0.37  | 2.44 | 2.94 | 3.59 | 4.57 | 5.95 | 7.72 | 10.23 |
| 13          | -0.34  | 4.70 | 0.36  | 2.56 | 3.06 | 3.72 | 4.70 | 6.05 | 7.74 | 10.11 |
| 14          | -0.34  | 4.90 | 0.34  | 2.75 | 3.27 | 3.93 | 4.90 | 6.21 | 7.83 | 10.03 |
| 15          | -0.33  | 5.13 | 0.32  | 2.97 | 3.50 | 4.17 | 5.13 | 6.41 | 7.96 | 10.01 |
| 16          | -0.32  | 5.30 | 0.30  | 3.14 | 3.67 | 4.34 | 5.30 | 6.55 | 8.04 | 9.98  |
| 17          | -0.32  | 5.36 | 0.30  | 3.21 | 3.74 | 4.42 | 5.36 | 6.60 | 8.05 | 9.92  |

**fLMI male**

| age (years) | lambda | mu   | sigma | 3%   | 10%  | 25%  | 50%  | 75%  | 90%   | 97%   |
|-------------|--------|------|-------|------|------|------|------|------|-------|-------|
| 6           | 0.07   | 9.38 | 0.06  | 8.36 | 8.67 | 9.00 | 9.38 | 9.78 | 10.15 | 10.53 |
| 7           | 0.06   | 9.10 | 0.07  | 7.92 | 8.28 | 8.66 | 9.10 | 9.57 | 10.01 | 10.46 |
| 8           | 0.06   | 8.85 | 0.09  | 7.51 | 7.92 | 8.34 | 8.85 | 9.37 | 9.88  | 10.40 |
| 9           | 0.06   | 8.64 | 0.09  | 7.22 | 7.65 | 8.10 | 8.64 | 9.20 | 9.74  | 10.30 |
| 10          | 0.05   | 8.48 | 0.10  | 7.05 | 7.48 | 7.94 | 8.48 | 9.06 | 9.61  | 10.19 |
| 11          | 0.05   | 8.40 | 0.10  | 6.95 | 7.38 | 7.85 | 8.40 | 8.99 | 9.55  | 10.14 |
| 12          | 0.05   | 8.40 | 0.10  | 6.93 | 7.37 | 7.84 | 8.40 | 8.99 | 9.56  | 10.15 |
| 13          | 0.04   | 8.46 | 0.11  | 6.94 | 7.39 | 7.88 | 8.46 | 9.09 | 9.68  | 10.31 |
| 14          | 0.04   | 8.60 | 0.12  | 6.88 | 7.39 | 7.94 | 8.60 | 9.31 | 10.00 | 10.72 |
| 15          | 0.04   | 8.78 | 0.13  | 6.91 | 7.46 | 8.06 | 8.78 | 9.56 | 10.32 | 11.13 |
| 16          | 0.04   | 8.99 | 0.12  | 7.14 | 7.68 | 8.28 | 8.99 | 9.75 | 10.50 | 11.29 |

|    |      |      |      |      |      |      |      |      |       |       |
|----|------|------|------|------|------|------|------|------|-------|-------|
| 17 | 0.03 | 9.21 | 0.11 | 7.46 | 7.98 | 8.54 | 9.21 | 9.93 | 10.62 | 11.35 |
|----|------|------|------|------|------|------|------|------|-------|-------|

**fLMI female**

| age (years) | lambda | mu   | sigma | 3%   | 10%  | 25%  | 50%  | 75%  | 90%  | 97%   |
|-------------|--------|------|-------|------|------|------|------|------|------|-------|
| 6           | -0.64  | 8.66 | 0.09  | 7.41 | 7.77 | 8.17 | 8.66 | 9.20 | 9.73 | 10.30 |
| 7           | -0.06  | 8.48 | 0.09  | 7.17 | 7.56 | 7.98 | 8.48 | 9.01 | 9.51 | 10.04 |
| 8           | 0.57   | 8.31 | 0.09  | 6.93 | 7.36 | 7.80 | 8.31 | 8.83 | 9.31 | 9.80  |
| 9           | 1.20   | 8.16 | 0.09  | 6.69 | 7.17 | 7.64 | 8.16 | 8.67 | 9.13 | 9.58  |
| 10          | 1.08   | 8.04 | 0.10  | 6.58 | 7.05 | 7.52 | 8.04 | 8.56 | 9.02 | 9.48  |
| 11          | 0.16   | 7.97 | 0.10  | 6.60 | 7.01 | 7.45 | 7.97 | 8.51 | 9.02 | 9.56  |
| 12          | -0.64  | 7.95 | 0.10  | 6.65 | 7.02 | 7.43 | 7.95 | 8.52 | 9.09 | 9.72  |
| 13          | -1.02  | 7.97 | 0.10  | 6.68 | 7.04 | 7.45 | 7.97 | 8.56 | 9.18 | 9.89  |
| 14          | -0.81  | 8.02 | 0.11  | 6.67 | 7.05 | 7.48 | 8.02 | 8.63 | 9.25 | 9.96  |
| 15          | -0.49  | 8.10 | 0.11  | 6.67 | 7.08 | 7.54 | 8.10 | 8.72 | 9.34 | 10.03 |
| 16          | -0.64  | 8.19 | 0.11  | 6.73 | 7.15 | 7.61 | 8.19 | 8.84 | 9.50 | 10.24 |
| 17          | -1.37  | 8.28 | 0.11  | 6.87 | 7.26 | 7.70 | 8.28 | 8.98 | 9.74 | 10.66 |

**fALMI male**

| age (years) | lambda | mu   | sigma | 3%   | 10%  | 25%  | 50%  | 75%  | 90%  | 97%  |
|-------------|--------|------|-------|------|------|------|------|------|------|------|
| 6           | -0.08  | 3.31 | 0.10  | 2.76 | 2.92 | 3.10 | 3.31 | 3.54 | 3.76 | 3.99 |
| 7           | -0.05  | 3.24 | 0.11  | 2.64 | 2.81 | 3.01 | 3.24 | 3.50 | 3.74 | 4.00 |
| 8           | -0.03  | 3.18 | 0.12  | 2.53 | 2.72 | 2.93 | 3.18 | 3.46 | 3.72 | 4.01 |
| 9           | -0.01  | 3.13 | 0.13  | 2.45 | 2.65 | 2.87 | 3.13 | 3.42 | 3.70 | 4.01 |
| 10          | 0.01   | 3.10 | 0.13  | 2.42 | 2.62 | 2.84 | 3.10 | 3.39 | 3.67 | 3.97 |
| 11          | 0.03   | 3.08 | 0.13  | 2.41 | 2.61 | 2.82 | 3.08 | 3.37 | 3.64 | 3.94 |
| 12          | 0.05   | 3.08 | 0.13  | 2.41 | 2.61 | 2.83 | 3.08 | 3.36 | 3.63 | 3.92 |
| 13          | 0.07   | 3.10 | 0.13  | 2.42 | 2.62 | 2.84 | 3.10 | 3.39 | 3.67 | 3.96 |
| 14          | 0.09   | 3.14 | 0.14  | 2.41 | 2.62 | 2.86 | 3.14 | 3.45 | 3.75 | 4.06 |
| 15          | 0.11   | 3.19 | 0.14  | 2.42 | 2.65 | 2.90 | 3.19 | 3.52 | 3.84 | 4.17 |
| 16          | 0.14   | 3.26 | 0.14  | 2.48 | 2.71 | 2.96 | 3.26 | 3.60 | 3.92 | 4.26 |
| 17          | 0.16   | 3.35 | 0.14  | 2.56 | 2.79 | 3.04 | 3.35 | 3.68 | 3.99 | 4.33 |

**fALMI female**

| age (years) | lambda | mu   | sigma | 3%   | 10%  | 25%  | 50%  | 75%  | 90%  | 97%  |
|-------------|--------|------|-------|------|------|------|------|------|------|------|
| 6           | -0.40  | 3.07 | 0.13  | 2.46 | 2.63 | 2.83 | 3.07 | 3.35 | 3.63 | 3.94 |
| 7           | 0.12   | 3.04 | 0.13  | 2.38 | 2.58 | 2.79 | 3.04 | 3.31 | 3.57 | 3.84 |
| 8           | 0.60   | 3.00 | 0.13  | 2.31 | 2.52 | 2.75 | 3.00 | 3.27 | 3.52 | 3.77 |
| 9           | 0.91   | 2.97 | 0.13  | 2.24 | 2.47 | 2.71 | 2.97 | 3.23 | 3.47 | 3.71 |
| 10          | 0.91   | 2.93 | 0.13  | 2.21 | 2.44 | 2.67 | 2.93 | 3.20 | 3.44 | 3.68 |
| 11          | 0.65   | 2.90 | 0.14  | 2.20 | 2.42 | 2.64 | 2.90 | 3.17 | 3.42 | 3.67 |
| 12          | 0.32   | 2.88 | 0.14  | 2.20 | 2.41 | 2.62 | 2.88 | 3.16 | 3.42 | 3.70 |
| 13          | 0.01   | 2.87 | 0.14  | 2.21 | 2.40 | 2.61 | 2.87 | 3.15 | 3.43 | 3.73 |
| 14          | -0.20  | 2.86 | 0.14  | 2.21 | 2.39 | 2.60 | 2.86 | 3.15 | 3.44 | 3.76 |
| 15          | -0.36  | 2.86 | 0.14  | 2.21 | 2.39 | 2.60 | 2.86 | 3.16 | 3.46 | 3.80 |
| 16          | -0.56  | 2.87 | 0.15  | 2.23 | 2.41 | 2.61 | 2.87 | 3.18 | 3.50 | 3.87 |
| 17          | -0.84  | 2.89 | 0.15  | 2.25 | 2.43 | 2.63 | 2.89 | 3.21 | 3.56 | 3.98 |

**fBMI male**

| age (years) | lambda | mu    | sigma | 3%    | 10%   | 25%   | 50%   | 75%   | 90%   | 97%   |
|-------------|--------|-------|-------|-------|-------|-------|-------|-------|-------|-------|
| 6           | -2.04  | 13.19 | 0.10  | 11.26 | 11.78 | 12.39 | 13.19 | 14.17 | 15.28 | 16.68 |
| 7           | -1.96  | 12.78 | 0.11  | 10.76 | 11.30 | 11.94 | 12.78 | 13.84 | 15.05 | 16.62 |
| 8           | -1.89  | 12.48 | 0.12  | 10.34 | 10.90 | 11.57 | 12.48 | 13.63 | 14.98 | 16.78 |
| 9           | -1.81  | 12.35 | 0.13  | 10.05 | 10.65 | 11.36 | 12.35 | 13.61 | 15.13 | 17.21 |
| 10          | -1.73  | 12.28 | 0.14  | 9.82  | 10.45 | 11.22 | 12.28 | 13.66 | 15.36 | 17.75 |
| 11          | -1.65  | 12.20 | 0.15  | 9.62  | 10.28 | 11.08 | 12.20 | 13.67 | 15.50 | 18.11 |
| 12          | -1.57  | 12.13 | 0.16  | 9.48  | 10.15 | 10.97 | 12.13 | 13.65 | 15.54 | 18.24 |
| 13          | -1.49  | 12.06 | 0.16  | 9.35  | 10.04 | 10.88 | 12.06 | 13.62 | 15.55 | 18.29 |
| 14          | -1.42  | 12.02 | 0.17  | 9.23  | 9.94  | 10.80 | 12.02 | 13.62 | 15.59 | 18.40 |
| 15          | -1.34  | 12.01 | 0.17  | 9.21  | 9.92  | 10.80 | 12.01 | 13.59 | 15.51 | 18.17 |
| 16          | -1.26  | 12.07 | 0.15  | 9.41  | 10.11 | 10.94 | 12.07 | 13.50 | 15.16 | 17.35 |
| 17          | -1.18  | 12.22 | 0.13  | 9.79  | 10.44 | 11.21 | 12.22 | 13.46 | 14.83 | 16.52 |

**fBMI female**

| age (years) | lambda | mu    | sigma | 3%    | 10%   | 25%   | 50%   | 75%   | 90%   | 97%   |
|-------------|--------|-------|-------|-------|-------|-------|-------|-------|-------|-------|
| 6           | -0.84  | 12.98 | 0.11  | 10.75 | 11.38 | 12.09 | 12.98 | 14.01 | 15.06 | 16.25 |
| 7           | -0.71  | 12.79 | 0.12  | 10.30 | 11.00 | 11.79 | 12.79 | 13.95 | 15.15 | 16.52 |
| 8           | -0.58  | 12.62 | 0.14  | 9.85  | 10.62 | 11.50 | 12.62 | 13.92 | 15.28 | 16.85 |
| 9           | -0.47  | 12.45 | 0.16  | 9.44  | 10.27 | 11.23 | 12.45 | 13.89 | 15.40 | 17.14 |
| 10          | -0.47  | 12.28 | 0.17  | 9.15  | 10.01 | 11.00 | 12.28 | 13.80 | 15.41 | 17.28 |
| 11          | -0.57  | 12.18 | 0.17  | 9.06  | 9.90  | 10.89 | 12.18 | 13.73 | 15.41 | 17.40 |
| 12          | -0.71  | 12.16 | 0.17  | 9.11  | 9.92  | 10.89 | 12.16 | 13.72 | 15.43 | 17.52 |
| 13          | -0.85  | 12.22 | 0.17  | 9.24  | 10.03 | 10.97 | 12.22 | 13.76 | 15.49 | 17.65 |
| 14          | -0.97  | 12.34 | 0.16  | 9.43  | 10.20 | 11.11 | 12.34 | 13.87 | 15.60 | 17.78 |
| 15          | -1.08  | 12.52 | 0.16  | 9.67  | 10.42 | 11.32 | 12.52 | 14.02 | 15.73 | 17.90 |
| 16          | -1.20  | 12.70 | 0.15  | 9.93  | 10.66 | 11.53 | 12.70 | 14.17 | 15.85 | 18.02 |
| 17          | -1.34  | 12.87 | 0.15  | 10.17 | 10.88 | 11.73 | 12.87 | 14.32 | 15.99 | 18.18 |
